# Supplementary material for: Novel fibers fabricated directly from chitin solution and their application as wound dressing
Source: Royal Society of Chemistry journal article supplement (doi:10.1039/c4tb00098f), 2014-01-01
Supplement: c4tb00098f1.pdf [file c4tb00098f1.pdf]

1 **Electronic Supplementary Information**

2

3

4

5

# **Novel Fibers Fabricated Directly from Chitin Solution and Their Application as Wound Dressing**

6

Yao Huang<sup>1</sup>, Zibiao Zhong<sup>2</sup>, Bo Duan<sup>1</sup>, Lina Zhang<sup>1\*</sup>, Zixuan Yang<sup>2</sup>, Yanfeng

7

Wang<sup>2</sup>, Qifa Ye<sup>2</sup>

8

<sup>1</sup> Department of Chemistry, Wuhan University, Wuhan 430072, China

9

<sup>2</sup> Zhongnan Hospital of Wuhan University, Institute of Hepatobiliary Diseases

10

of Wuhan University, Wuhan, 430071, China

11

12

13

14

15

16

17

18

19

20

21

---

\* To whom correspondence should be addressed. Phone: +86-27-87219274.

Fax: +86-27-68762005. E-mail: zhangln@whu.edu.cn; linazhangwhu@gmail.com

## 1 Experimental Section

### 2 Materials

3 Raw chitin powder was purchased from Zhejiang Golden Shell Biochemical Co.  
4 Ltd. (China) and purified by established method before use. Specifically, raw chitin  
5 was treated with 5 wt% NaOH solution for 10 h with stirring to remove residual  
6 protein. The resultant suspension was filtered and washed with distilled water.  
7 Subsequently, the chitin powder was treated with 7% (v/v) commercial hydrochloric  
8 acid aqueous solution for 1 day to remove residual minerals. After filtration and  
9 rinsing, the treated sample was dispersed in a 5 wt% NaOH solution for 24 h. Finally,  
10 the samples were bleached by 1.7 wt% sodium chlorite solution at 80°C for 6h in a  
11 0.3M sodium acetate buffer, and then washed with distilled water and oven dried to  
12 obtain purified chitin powder. The degree of acetylation (DA) of the original and  
13 purified chitin powder was calculated to be 90% and 94%, respectively, according to

$$14 \quad A_{1560}/A_{2875} = 0.0125 \times DA + 0.2 \quad (1)$$

15 where  $A_{1560}/A_{2875}$  is the absorbance ratio of the absorption bands at  $1560\text{cm}^{-1}$  and  
16  $2875\text{ cm}^{-1}$  in Fourier transform infrared (FT-IR) spectra<sup>1</sup>. The molecular weight ( $M_w$ )  
17 was determined to be  $3.2 \times 10^5$  in 5% (w/v) LiCl/DMAc by dynamic light scattering  
18 (DLS, ALV/GGS-8F, ALV, Germany). All the other chemical reagents were  
19 purchased from commercial sources in China, and were of analytical-grade.

20

21

22

## 1 **Characterization**

2 FT-IR spectra of chitin fibers were recorded on a Fourier transform infrared  
3 spectrometer (model 1600, Perkin-Elmer Co., USA) at room temperature. X-ray  
4 diffraction (XRD) measurements were carried out on a WXR D diffractometer (D8-  
5 Advance, Bruker, USA) with Cu K $\alpha$  radiation ( $\lambda = 0.15406$  nm) at 40 kV and 30mA.  
6 The XRD pattern was recorded in the range  $2\theta = 5\text{--}30^\circ$  at a scanning speed of  $2^\circ/\text{min}$ .  
7 Cross-polarization/magic angle spinning (CP/MAS) solid-state  $^{13}\text{C}$  NMR spectra were  
8 recorded on a Bruker AVANCE-600 Spectrometer ( $^{13}\text{C}$  frequency = 150.96 MHz)  
9 with a standard 4 mm rotor at ambient temperature. The spinning rate and the  
10 relaxation time were 5.0 kHz and 4.0 s, respectively. The cross polarization time was  
11 1.0 ms. The lyophilized fibers and nonwoven fabrics were trimmed into small  
12 particles and dried in vacuum oven at  $6^\circ\text{C}$  for 48 h before use.  
13 Scanning electron microscopy (SEM) of fibers was carried out on a Hitachi S-570  
14 (Japan) microscope. The wet fibers were frozen in liquid nitrogen, snapped  
15 immediately, and then freeze-dried. The air-dried fibers were cut into short staples  
16 with medical scissors. The surfaces and fracture sections were sputtered with gold for  
17 observation. Cross section of a bunch of dried fibers obtained by a Y172 fiber slicer  
18 was observed on an ordinary optical microscope. The fineness (linear density) of  
19 chitin fibers were measured on a precision electronic balance by weighing 200 single  
20 fibrils each with a length of 5cm, and for every sample, three parallel measurements  
21 were conducted. If a fibril with a total length of 1000m weighs 1g, then its titer value  
22 was 1 tex or 10 dtex. The mechanical properties of the films at the dry state were

1 measured on an electronic single fiber strength tester (LLY-06, Wuhan Textile  
2 University, China) according to ASTM method D2256-80<sup>2</sup>. For each sample, 50  
3 single fibrils were tested and an average value was recorded to calculate the tensile  
4 strength and elongation at break.

5 To test the water uptake, the chitin nonwoven and commercial gauze were  
6 preconditioned at 40 °C for 48 h and weighed ( $W_0$ ). After immersing in distilled  
7 water until an equilibrium was reached, the extra water were removed with filter  
8 paper and the samples were weighed again ( $W_t$ ). The water uptake ratio was measured  
9 according to the following equation<sup>3</sup>

$$10 \quad \text{water uptake(\%)} = \frac{W_t - W_0}{W_0} \times 100 \quad (2)$$

11 For each sample, three parallels were tested to obtain an average value. As a result,  
12 The air permeability for both chitin nonwoven fabrics and gauze were measured on a  
13 YG 461E/II numerical air permeability tester (Ningbo Textile Instrument Factory,  
14 Zhejiang, China) under a pressure of 100Pa, according to a national standard of GB/T  
15 5453-1997. The testing area was 20 cm<sup>2</sup> and a nozzle of 8.0 mm was selected. For  
16 each sample, five parallels were tested to obtain an average value. The tensile strength  
17 of chitin nonwoven fabrics was measured on a a universal testing machine (CMT  
18 6503, Shenzhen SANS Test machine Co., Ltd., China) according to ISO527-3-1995  
19 (E) at a speed of 1mm/min. Ten parallels were measured and the average value was  
20 reported.

21

1

## 2 **Results**

### 3 **Structure of pure chitin fibers and nonwoven fabrics**

4 Figure S1 shows the FT-IR spectra of the purified chitin powder, the regenerated  
5 chitin fibers and the chitin nonwoven. The characteristic absorption peaks of  $\alpha$ -chitin  
6 at 1660, 1620 (amide I), and 1560 $\text{cm}^{-1}$  (amide II) <sup>4</sup> appeared in FT-IR spectra for all  
7 samples. The N-H stretching vibration peak around 3200  $\text{cm}^{-1}$ , amide I and amide II  
8 hardly changed after dissolution and regeneration from the alkali/urea solution. This  
9 indicated that no obvious deacetylation occurred during dissolution and regeneration,  
10 which were mainly physical processes. Furthermore, according to calculation based  
11 on Eq. (1), the DA values of chitin fiber and chitin nonwoven were 93%, showing no  
12 clear variation when compared to that of the chitin powder (94%). XRD patterns of  
13 the chitin powder, chitin fibers and chitin nonwoven are shown in Figure S2. The  
14 chitin fibers and nonwoven fabrics retained the intrinsic crystal form of  $\alpha$ -chitin as  
15 well as raw and purified chitin powder. The crystal plane was labeled above the  
16 curves. The crystallinity ( $\chi_c$ ) and the crystallite size of the chitin could be calculated  
17 by multi-peak fitting and the Scherrer equation

$$18 \quad L_{hkl} = K\lambda / \beta_0 \cos\theta \quad (3)$$

19 where  $K= 0.9$ ;  $L_{hkl}$  was the crystallite size in the vertical direction to the  $hkl$  plane;  $\lambda$   
20 was the wavelength (0.154nm) and  $\beta_0$  was the full width at half maximum for  $2\theta$ .<sup>1</sup>

21 The  $\chi_c$  and  $L_{hkl}$  values for the chitin powder, chitin fibers and chitin nonwoven are  
22 listed in Table S1. For fibers and nonwoven after a process of dissolution and

1 regeneration, there was a clear decrease in the crystallinity as well as in the crystallite  
2 size. This could be explained by the intervention of solvents which generally involves  
3 disruption of the original crystal form. Compared to fibers, the crystallinity and  
4 crystallite size for nonwoven fabrics slightly improved, probably due to the hot  
5 pressing induced orientation, which increased the tendency of ordered arrangement.

6 Solid state  $^{13}\text{C}$  NMR spectra of the purified chitin powder, chitin fibers and  
7 chitin nonwoven are presented in Figure S3. The spectrum of the chitin powder  
8 exhibited eight main signals, including sharp peaks at 172.2 and 22.2 ppm assigned to  
9 the carbonyl and methyl carbons, respectively. And peaks at 103.2, 82.1, 74.9, 72.4,  
10 59.7 and 54.1 ppm were ascribed to C1, C4, C5, C3, C6, and C2 on the glucosamine  
11 unit of chitin, respectively, as labeled above the curves. Notably, the signals assigned  
12 to C3 and C5 for both the regenerated chitin fibers and chitin nonwoven appeared as  
13 two separate peaks, indicating the same  $\alpha$ -chitin structure as the ingredient, which was  
14 in accordance with FTIR and XRD.

15

## 1 References

2 1. B. Duan, C. Chang, B. Ding, J. Cai, M. Xu, S. Feng, J. Ren, X. Shi, Y. Du and L.  
3 Zhang, *J. Mater. Chem. A*, 2013, **1**, 1867-1874.

4 2. J. Cai, L. Zhang, J. Zhou, H. Li, H. Chen and H. Jin, *Macromol. Rapid Commun.*,  
5 2004, **25**, 1558-1562.

6 3. M. He, M. Xu and L. Zhang, *ACS Applied Materials & Interfaces*, 2013, 585-591.

7 4. S. Ifuku, M. Nogi, K. Abe, M. Yoshioka, M. Morimoto, H. Saimoto and H. Yano,  
8 *Biomacromolecules*, 2009, **10**, 1584-1588.

9

10

11

12

13

1

2 **Table S1** structural properties of purified chitin powder, chitin fibers and chitin  
3 nonwoven.

| Sample          | DA (%) | $\chi_c$ (%) | $L_{020}$ (nm) | $L_{110}$ (nm) |
|-----------------|--------|--------------|----------------|----------------|
| Chitin powder   | 94     | 77           | 8.76           | 5.92           |
| Chitin fibers   | 93     | 45           | 7.09           | 3.22           |
| Chitin nonwoven | 93     | 56           | 8.13           | 4.43           |

4

5



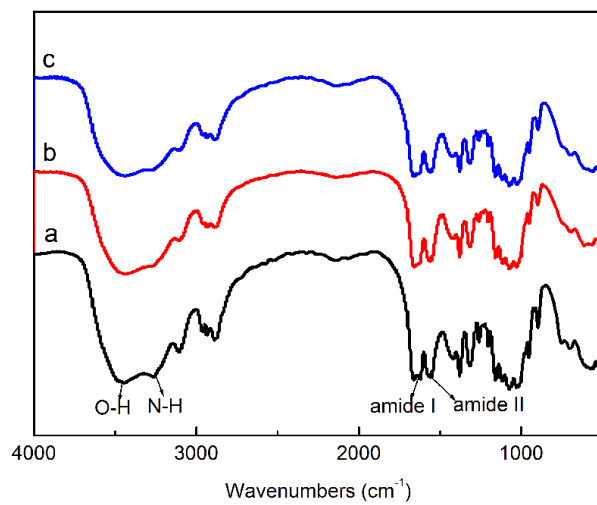

1

2 **Figure S1.** FTIR spectra of the purified chitin powder (a), regenerated pure chitin  
3 fibers (b) and chitin nonwoven fabrics (c).

4

5

1

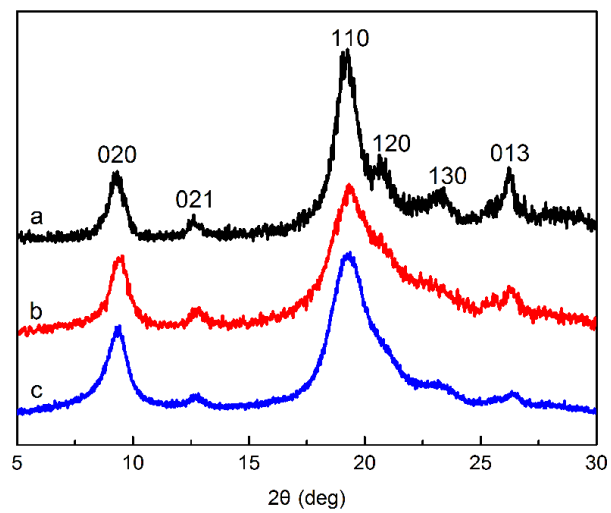

2

3 **Figure S2.** XRD patterns of the purified chitin powder (a), regenerated chitin fibers (b)  
4 and chitin nonwoven fabrics (c).

5

1

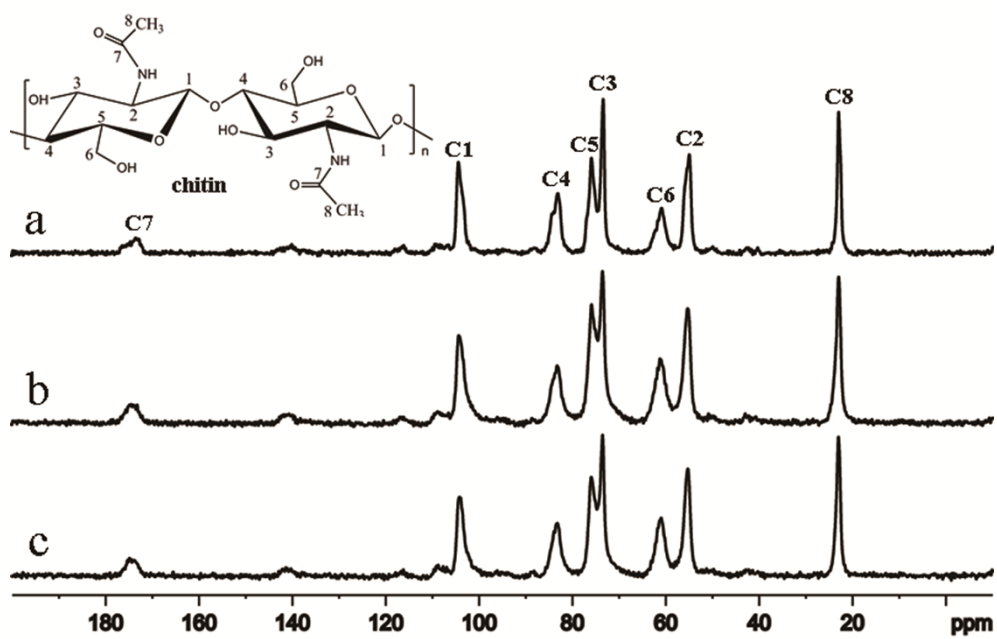

2

3 **Figure S3.** Solid state  $^{13}\text{C}$  NMR spectra of the purified chitin powder (a),  
4 regenerated chitin fibers (b) and chitin nonwoven fabrics (c).

5

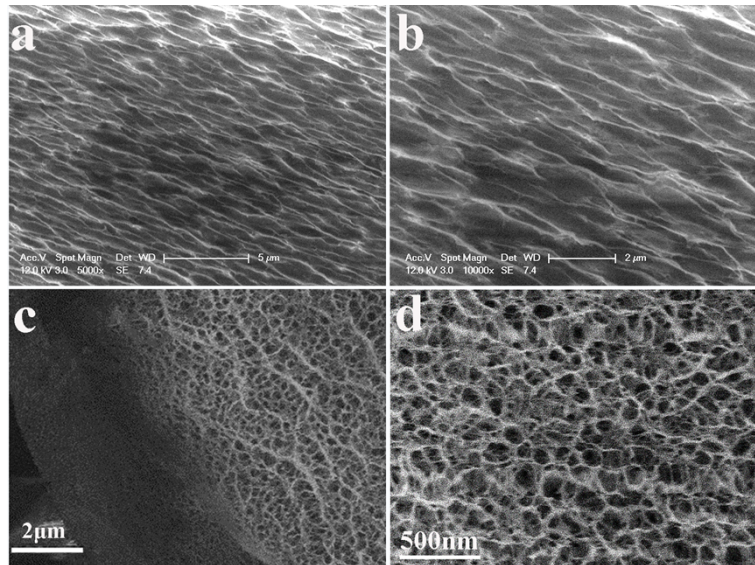

1

2 **Figure S4.** SEM images for wet chitin fibers lyophilized and fractured in liquid  
3 nitrogen: (a-b) surface at different magnification; near the sheath (c) and around the  
4 core (d) in the cross section. Scale: 5μm for (a), 2μm for (b-c) and 500nm for (d).

5

6

7

8

9

10

11

12

13

14

15

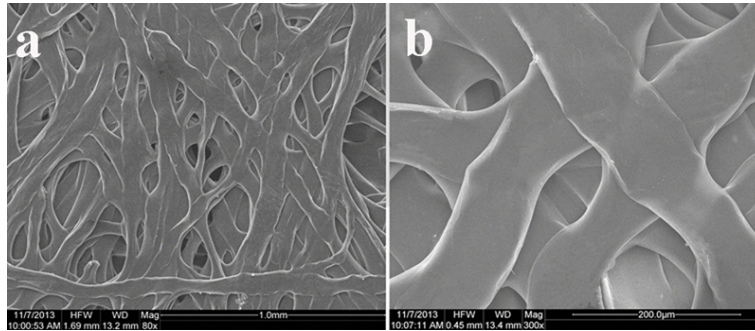

1

2 **Figure S5.** SEM images of surface of chitin nonwoven fabrics made of chitin fibers

3 without solvent exchange to acetone. Scales: 1mm in (a) and 200  $\mu\text{m}$  in (b).

4

1

2

3

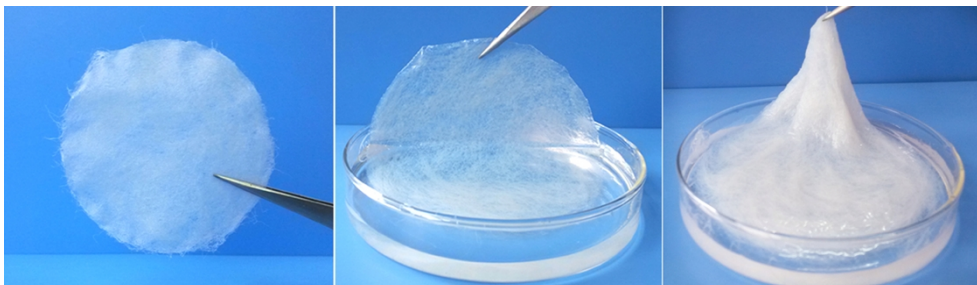

4

5

6 **Figure S6.** Photographs of chitin nonwoven fabrics without solvent exchange at dry  
7 state (a), just being soaked in water (b) and kept in water over several hours (c).

8

9

10

11

12

13

14

15

16

17

18

19

20

21

22

23

24

25

26

27

28

29

30

31

32

33

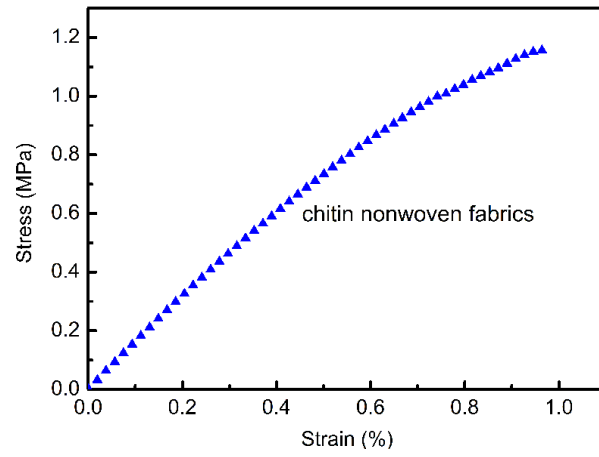

1

2

**Figure S7.** Stress-strain curve of chitin nonwoven fabrics.

3

4
